# Supplementary material for: The ABO histo-blood group, endothelial activation, and acute respiratory distress syndrome risk in critical illness
Source: JCI journal article supplement (doi:10.1172/jci139700), 2020-09-15
Supplement: sd1 [file 1]

**Supplemental Table 1.** Patient Populations.

|                            | <b>PETROS</b>                                                                   | <b>MESSI</b>                                                               | <b>iSPAAR Cases</b>                                                    | <b>iSPAAR Controls</b>               |
|----------------------------|---------------------------------------------------------------------------------|----------------------------------------------------------------------------|------------------------------------------------------------------------|--------------------------------------|
| <b>Study Design</b>        | Prospective Cohort                                                              | Prospective Cohort                                                         | Case Control Study                                                     |                                      |
| <b>Study Site</b>          | Penn Medicine                                                                   | Penn Medicine                                                              | NIH ARDSNet Studies<br>Mass General Hospital                           | Mass General Hospital                |
| <b>Population</b>          | Trauma                                                                          | Sepsis                                                                     | Sepsis                                                                 |                                      |
| <b>Inclusion Criteria</b>  | - acute traumatic injury (<24 hours)<br>- injury severity score >15             | - Sepsis-2 criteria for severe sepsis or septic shock                      | - ARDS by American European Consensus Criteria<br>- Sepsis -2 criteria | - Sepsis-2 criteria                  |
| <b>Exclusion Criteria</b>  | - die or discharge within 24 hours<br>- isolated head trauma<br>- incarceration | - admitted from a long-term acute care facility<br>- do not intubate order | * see specific ARDSNet study exclusion criteria                        | - ARDS risk factor other than sepsis |
| <b>Genotyping Platform</b> | Affymetrix AxionTxv1 Array                                                      |                                                                            | Illumina Human610-Quad Bead Array                                      |                                      |

**Supplemental Table 2.** Single nucleotide polymorphisms utilized to infer ABO blood type alleles in PETROS, MESSI, and iSPAAR.

|                                      | Single Nucleotide Polymorphism in the <i>ABO</i> gene |           |           |
|--------------------------------------|-------------------------------------------------------|-----------|-----------|
| <b>ABO Allele –<br/>PETROS/MESSI</b> | rs8176719                                             | rs1053878 | rs8176746 |
| A1                                   | G                                                     | G         | C         |
| A2                                   | G                                                     | A         | C         |
| B                                    | G                                                     | G         | A         |
| O                                    | -                                                     | G         | G         |
|                                      |                                                       |           |           |
| <b>ABO Allele - iSPAAR</b>           | rs505922                                              | rs8176704 | rs8176746 |
| A1                                   | C                                                     | G         | C         |
| A2                                   | C                                                     | A         | C         |
| B                                    | C                                                     | G         | A         |
| O                                    | T                                                     | G         | C         |

**Supplemental Table 3.** Concordance of genetically determined blood type and ABO blood type by chart review in PETROS and MESSI

| <b>PETROS</b> | <b>ABO BLOOD TYPE</b> |          |           |          |       |
|---------------|-----------------------|----------|-----------|----------|-------|
|               | <b>A</b>              | <b>B</b> | <b>AB</b> | <b>O</b> | Total |
| <b>A1A1</b>   | 23                    | 0        | 0         | 2        | 23    |
| <b>A1A2</b>   | 20                    | 0        | 0         | 1        | 15    |
| <b>A1O</b>    | 173                   | 3        | 1         | 20       | 173   |
| <b>A2A2</b>   | 7                     | 0        | 0         | 0        | 3     |
| <b>A2O</b>    | 132                   | 6        | 0         | 14       | 128   |
| <b>BB</b>     | 0                     | 15       | 0         | 1        | 13    |
| <b>BO</b>     | 13                    | 164      | 1         | 7        | 162   |
| <b>A1B</b>    | 1                     | 1        | 30        | 0        | 31    |
| <b>A2B</b>    | 1                     | 0        | 18        | 2        | 20    |
| <b>OO</b>     | 22                    | 8        | 2         | 524      | 464   |
| Total         | 392                   | 197      | 52        | 571      | 1,212 |
|               |                       |          |           |          |       |
| <b>MESSI</b>  | <b>ABO BLOOD TYPE</b> |          |           |          |       |
|               | <b>A</b>              | <b>B</b> | <b>AB</b> | <b>O</b> | Total |
| <b>A1A1</b>   | 24                    | 0        | 0         | 0        | 24    |
| <b>A1A2</b>   | 27                    | 0        | 0         | 1        | 28    |
| <b>A1O</b>    | 179                   | 0        | 0         | 19       | 198   |
| <b>A2A2</b>   | 10                    | 0        | 0         | 0        | 10    |
| <b>A2O</b>    | 107                   | 0        | 0         | 3        | 110   |
| <b>BB</b>     | 0                     | 14       | 0         | 1        | 15    |
| <b>BO</b>     | 5                     | 116      | 0         | 1        | 122   |
| <b>A1B</b>    | 2                     | 4        | 29        | 1        | 36    |
| <b>A2B</b>    | 0                     | 1        | 18        | 0        | 19    |
| <b>OO</b>     | 6                     | 0        | 0         | 450      | 456   |
| Total         | 360                   | 135      | 47        | 476      | 1,018 |

Nine subjects do not have a blood type available in MESSI (96% concordance in MESSI, 91% in Trauma).

**Supplemental Table 4.** Unadjusted Distributions of moderate or severe ARDS risk by ABO genotype among the prospective cohort studies PETROS, MESSI overall population, and MESSI non-pulmonary sepsis.

|             | PETROS |        | MESSI |        | MESSI Non-Pulmonary |        |
|-------------|--------|--------|-------|--------|---------------------|--------|
|             | No.    | % ARDS | No.   | % ARDS | No.                 | % ARDS |
| <b>A1A1</b> | 25     | 32%    | 24    | 54%    | 14                  | 36%    |
| <b>A1A2</b> | 21     | 19%    | 28    | 43%    | 16                  | 31%    |
| <b>A1O</b>  | 197    | 25%    | 198   | 39%    | 120                 | 35%    |
| <b>A2A2</b> | 7      | 14%    | 10    | 40%    | 8                   | 38%    |
| <b>A2O</b>  | 152    | 20%    | 111   | 43%    | 57                  | 28%    |
| <b>BB</b>   | 16     | 31%    | 15    | 40%    | 9                   | 0%     |
| <b>BO</b>   | 185    | 21%    | 125   | 34%    | 65                  | 22%    |
| <b>A1B</b>  | 32     | 9%     | 36    | 39%    | 18                  | 28%    |
| <b>A2B</b>  | 21     | 14%    | 19    | 32%    | 10                  | 30%    |
| <b>OO</b>   | 556    | 16%    | 461   | 34%    | 233                 | 21%    |
| Total       | 1,212  | 19%    | 1,027 | 37%    | 550                 | 26%    |

**Supplemental Table 5.** Adjusted association of the ABO blood type A1 allele versus O with moderate or severe ARDS risk, excluding patients enrolled in our previous non-genetic study of ABO blood type and ARDS, and adjusted association of ABO blood type A1 allele versus all other blood types in overall population.

| <b>Population – Excluding previous patients</b> |               | <b>No.</b> | <b>OR (95% CI) A1 vs. O<sup>A</sup></b>   | <b>p</b> |
|-------------------------------------------------|---------------|------------|-------------------------------------------|----------|
| <b>PETROS<sup>B</sup></b>                       | Overall       | 739        | 1.83 (1.06, 3.16)                         | 0.031    |
| <b>MESSI<sup>C</sup></b>                        | Overall       | 605        | 1.38 (0.89, 2.15)                         | 0.149    |
|                                                 | Pulmonary     | 280        | 1.16 (0.61, 2.18)                         | 0.649    |
|                                                 | Non-Pulmonary | 325        | 1.71 (0.91, 3.22)                         | 0.095    |
| <b>Population – Comparing A1 vs. not A1</b>     |               | <b>No.</b> | <b>OR (95% CI) A1 vs. not<sup>C</sup></b> | <b>p</b> |
| <b>PETROS<sup>B</sup></b>                       | Overall       | 1212       | 1.44 (1.01, 2.05)                         | 0.043    |
| <b>MESSI<sup>C</sup></b>                        | Overall       | 1027       | 1.37 (1.01, 1.86)                         | 0.045    |
|                                                 | Pulmonary     | 550        | 1.05 (0.68, 1.64)                         | 0.820    |
|                                                 | Non-Pulmonary | 477        | 1.70 (1.11, 2.60)                         | 0.015    |

<sup>A</sup>Odds ratios and 95% confidence intervals were obtained via multivariable logistic regression with the primary comparison between subjects with an A1 allele to subjects with the OO genotype. <sup>B</sup>The PETROS cohort analysis was adjusted for age, sex, injury severity score, mechanism of trauma, and population stratification. <sup>C</sup>The MESSI cohort analysis was adjusted for age, sex, transfusions, history of diabetes, history of cancer, source of sepsis, and population stratification. <sup>C</sup>Odds ratios and 95% confidence intervals were obtained via multivariable logistic regression with the primary comparison between subjects with an A1 allele to all other subjects without an A1 allele.

**Supplemental Table 6.** Unadjusted distribution of ABO genotypes in the overall iSPAAR case control study, and ISPAAR patients with non-pulmonary sepsis separated by ARDS cases and controls.

|             | iSPAAR    |          | iSPAAR non-pulmonary |          |
|-------------|-----------|----------|----------------------|----------|
|             | NO ARDS   | ARDS     | NO ARDS              | ARDS     |
| <b>A1A1</b> | 26 (2%)   | 9 (5%)   | 13 (2%)              | 9 (5%)   |
| <b>A1A2</b> | 27 (2%)   | 7 (4%)   | 12 (2%)              | 6 (3%)   |
| <b>A1O</b>  | 315 (25%) | 60 (30%) | 163 (25%)            | 56 (31%) |
| <b>A2A2</b> | 4 (<1%)   | 0 (0%)   | 2 (<1%)              | 0 (0%)   |
| <b>A2O</b>  | 103 (8%)  | 16 (8%)  | 51 (8%)              | 14 (8%)  |
| <b>BB</b>   | 14 (1%)   | 1 (1%)   | 10 (2%)              | 1 (1%)   |
| <b>BO</b>   | 135 (11%) | 14 (7%)  | 65 (10%)             | 13 (7%)  |
| <b>A1B</b>  | 36 (3%)   | 4 (2%)   | 16 (2%)              | 4 (2%)   |
| <b>A2B</b>  | 58(1%)    | 0 (0%)   | 4 (1%)               | 0 (0%)   |
| <b>OO</b>   | 605 (47%) | 87 (44%) | 315 (48%)            | 75 (42%) |
| Total       | 1,273     | 198      | 651                  | 178      |

**Supplemental Table 7.** Association of possession of an A1 allele versus O and moderate or severe ARDS risk among “non-secretors” in MESSI and PETROS.

| <b>Population</b>                                            |               | <b>No.</b> | <b>OR (95% CI) A1 vs. O<sup>A</sup></b> | <b>p</b> |
|--------------------------------------------------------------|---------------|------------|-----------------------------------------|----------|
| <b>PETROS<sup>B</sup></b>                                    | Overall       | 305        | 2.84 (1.27, 6.34)                       | 0.011    |
| <b>MESSI<sup>C</sup></b>                                     | Overall       | 245        | 1.41 (0.66, 2.49)                       | 0.369    |
|                                                              | Non-Pulmonary | 127        | 2.37 (0.75, 7.55)                       | 0.143    |
|                                                              | Pulmonary     | 118        | 1.10 (0.35, 3.43)                       | 0.867    |
| <b>Combined PETROS &amp; Non-pulmonary MESSI<sup>D</sup></b> |               | 432        | 2.15 (1.18, 3.92)                       | 0.012    |

<sup>A</sup>Odds ratios and 95% confidence intervals were obtained via multivariable logistic regression with the primary comparison between subjects with an A1 allele to subjects with the OO genotype. <sup>B</sup>The PETROS cohort analysis was adjusted for age, sex, injury severity score, mechanism of trauma, and population stratification. <sup>C</sup>The MESSI cohort analysis was adjusted for age, sex, source of sepsis, and population stratification. <sup>D</sup>The combine cohort was adjusted for age, sex, sepsis versus trauma, and population stratification.

**Supplemental Table 8.** Correlation Matrix for Endothelial Derived Glycoproteins

| Biomarker  | vWF  | sTM  | sICAM-1 | E-selectin |
|------------|------|------|---------|------------|
| vWF        | XXXX | 0.48 | 0.35    | 0.30       |
| sTM        |      | XXXX | 0.53    | 0.45       |
| sICAM-1    |      |      | XXXX    | 0.45       |
| E-selectin |      |      |         | XXXX       |

Values represent the Spearman Rho. All correlations are statistically significant with a p-value <0.01.

**Supplemental Table 9.** Endothelial Plasma Biomarkers by Clinically Determined ABO Blood Type.

|                    |                | MESSI – Sepsis |                    |       | PETROS – Trauma |                  |       |
|--------------------|----------------|----------------|--------------------|-------|-----------------|------------------|-------|
| Biomarker          | ABO Blood Type | N              | Median (IQR)       | p     | N               | Median (IQR)     | p     |
| <b>sICAM-1</b>     | Overall        | 553            | 358 (198, 599)     | 0.015 | 559             | 181 (131, 238)   | 0.099 |
|                    | A              | 195            | 395 (213, 731)     |       | 182             | 186 (136, 250)   |       |
|                    | B              | 75             | 345 (207, 599)     |       | 91              | 180 (138, 237)   |       |
|                    | AB             | 24             | 406 (233, 595)     |       | 19              | 191 (131, 282)   |       |
|                    | O              | 259            | 336 (184, 543)     |       | 267             | 175 (125, 231)   |       |
| <b>vWF</b>         | Overall        | 569            | 327 (240, 464)     | 0.018 | 560             | 196 (145, 274)   | 0.008 |
|                    | A              | 199            | 339 (259, 483)     |       | 182             | 201 (153, 274)   |       |
|                    | B              | 80             | 359 (280, 470)     |       | 91              | 217 (153, 309)   |       |
|                    | AB             | 24             | 350 (261, 506)     |       | 19              | 305 (182, 333)   |       |
|                    | O              | 266            | 304 (210, 444)     |       | 268             | 185 (129, 251)   |       |
| <b>sTM</b>         | Overall        | 569            | 7.6 (5.3, 12.0)    | 0.234 | 560             | 3.8 (2.9, 5.0)   | 0.031 |
|                    | A              | 200            | 8.0 (5.4, 12.4)    |       | 183             | 3.9 (3.0, 5.1)   |       |
|                    | B              | 80             | 7.7 (5.2, 12.0)    |       | 91              | 3.9 (3.2, 5.0)   |       |
|                    | AB             | 24             | 8.8 (5.9, 11.4)    |       | 18              | 5.4 (3.8, 6.8)   |       |
|                    | O              | 265            | 7.1 (5.3, 12.0)    |       | 268             | 3.6 (2.7, 4.8)   |       |
| <b>sE-selectin</b> | Overall        | 554            | 58.2 (29.9, 103.1) | 0.001 | 561             | 20.9 (3.8, 33.1) | 0.001 |
|                    | A              | 194            | 50.3 (25.3, 85.8)  |       | 183             | 16.0 (3.4, 26.6) |       |
|                    | B              | 77             | 60.0 (31.8, 93.5)  |       | 91              | 18.1 (3.6, 34.5) |       |
|                    | AB             | 24             | 61.1 (35.8, 121.4) |       | 19              | 13.9 (3.7, 23.3) |       |
|                    | O              | 259            | 64.9 (35.1, 117.0) |       | 268             | 26.8 (4.4, 36.9) |       |

P-values are for the comparison of ABO blood type A versus O using the Wilcoxon Rank-sum test separately for MESSI and PETROS. Concentrations of sICAM-1, sTM, and sE-selectin are in ng/mL. Concentrations of vWF are represented as percentage of control specimen.
